# Supplementary material for: ICG-loaded and 125I-labeled theranostic nanosystem for multimodality imaging-navigated phototherapy of breast cancer
Source: Royal Society of Chemistry journal article supplement (doi:10.1039/d2bm01551j), 2022-11-16
Supplement: d2bm01551j1.pdf [file d2bm01551j1.pdf]

## Supplementary Information

### ICG-Loaded and $^{125}\text{I}$ -Labeled Theranostic Nanosystem for Multimodality

#### Imaging-Guided Phototherapy of Breast Cancer

Dianyu Wang,<sup>a,#</sup> Jianlan Yue,<sup>b,c,#</sup> Qiannan Cao,<sup>a,#</sup> Jinjian Liu,<sup>a</sup> Lijun Yang,<sup>a,\*</sup> Wen Shen,<sup>d,\*</sup> Wenxue Zhang,<sup>e,\*</sup> and Jianfeng Liu<sup>a,\*</sup>

<sup>a</sup> Key Laboratory of Radiopharmacokinetics for Innovative Drugs, Chinese Academy of Medical Sciences, and Institute of Radiation Medicine, Chinese Academy of Medical Sciences & Peking Union Medical College, Tianjin 300192, P. R. China.

<sup>b</sup> Department of Radiology, First Central Clinical College, Tianjin Medical University, Tianjin 300192, P. R. China.

<sup>c</sup> Department of Nuclear Medicine, Characteristic Medical Center of Chinese People's Armed Police Forces, Tianjin 300162, P. R. China.

<sup>d</sup> Department of Radiology, Tianjin First Central Hospital, School of Medicine, Nankai University, Tianjin 300192, P. R. China.

<sup>e</sup> Radiation Oncology Department, Tianjin Medical University General Hospital, Tianjin 300052, P. R. China.

# These authors contributed equally to this work.

\* Corresponding authors

Prof. Lijun Yang, E-mail address: yanglijun@irm-cams.ac.cn

Prof. Wen Shen, E-mail address: shenwen66happy@126.com

Prof. Wenxue Zhang, E-mail address: wenzuezhang@tmu.edu.cn

Prof. Jianfeng Liu, E-mail address: liujianfeng@irm-cams.ac.cn

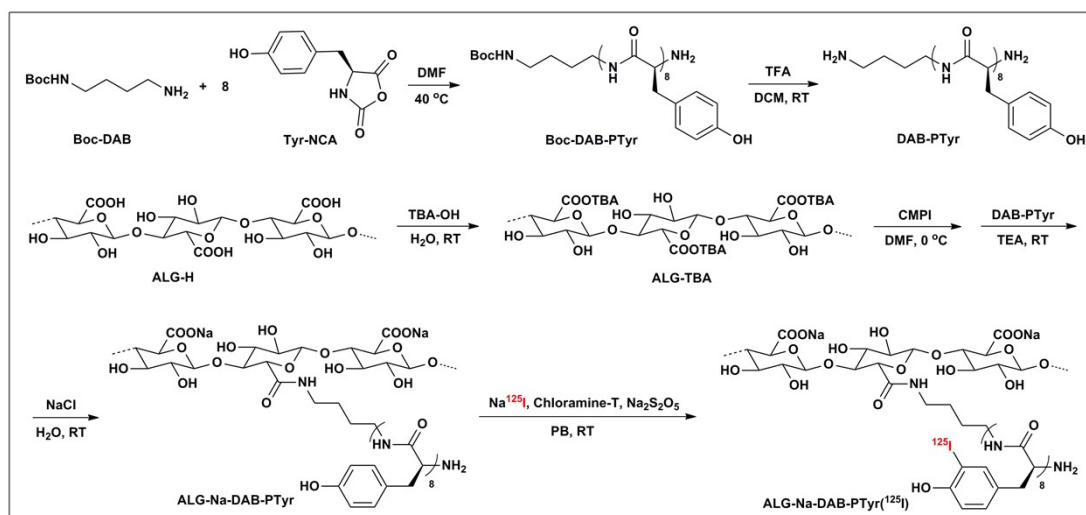

**Fig. S1** The synthesis route for ALG-Na-DAB-PTyr(<sup>125</sup>I).

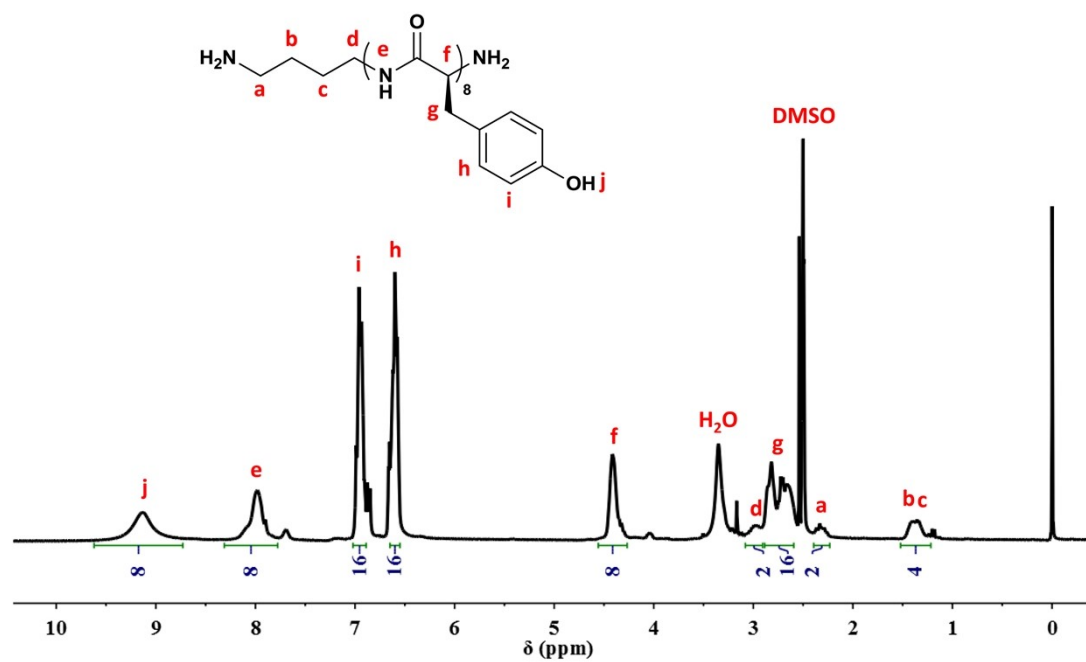

**Fig. S2** <sup>1</sup>H NMR spectrum of DAB-PTyr in DMSO-d<sub>6</sub>.

| Element | C%    | H%   | N%   |
|---------|-------|------|------|
| Content | 34.31 | 5.52 | 1.13 |

**Fig. S3** The elemental analysis of ALG-Na-DAB-PTyr.

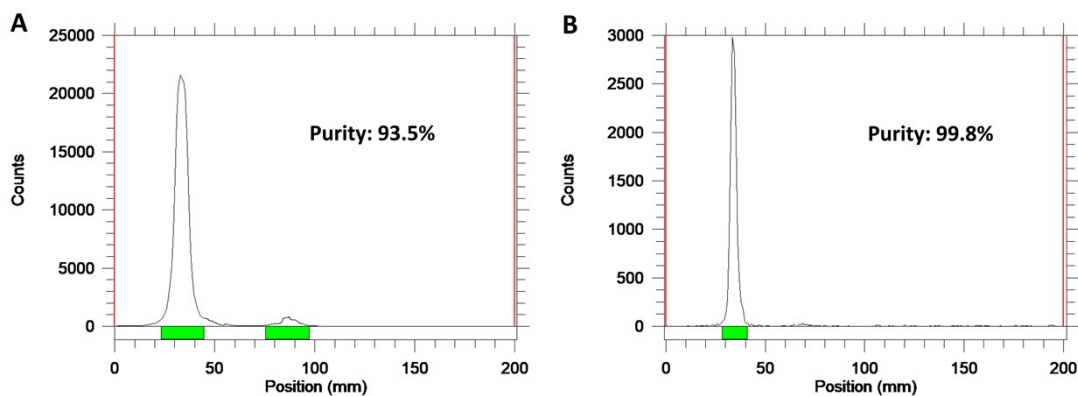

**Fig. S4** The radiolabeling rate (A) and the radiochemical purity (B) of ALG-Na-DAB-PTyr(<sup>125</sup>I) determined by a radioactive TLC scanner.

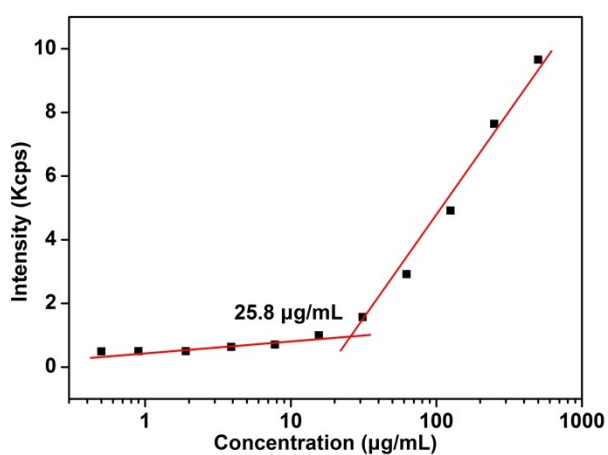

**Fig. S5** The CMC of ADY(<sup>125</sup>I) NPs determined by using Nile Red as the fluorescence probe.

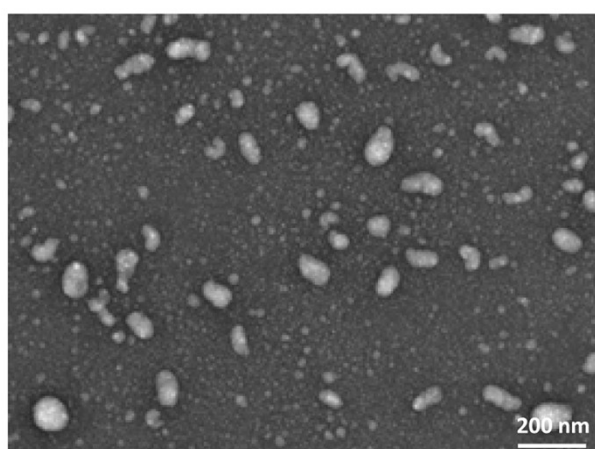

**Fig. S6** The representative TEM image of ADY(<sup>125</sup>I) NPs.

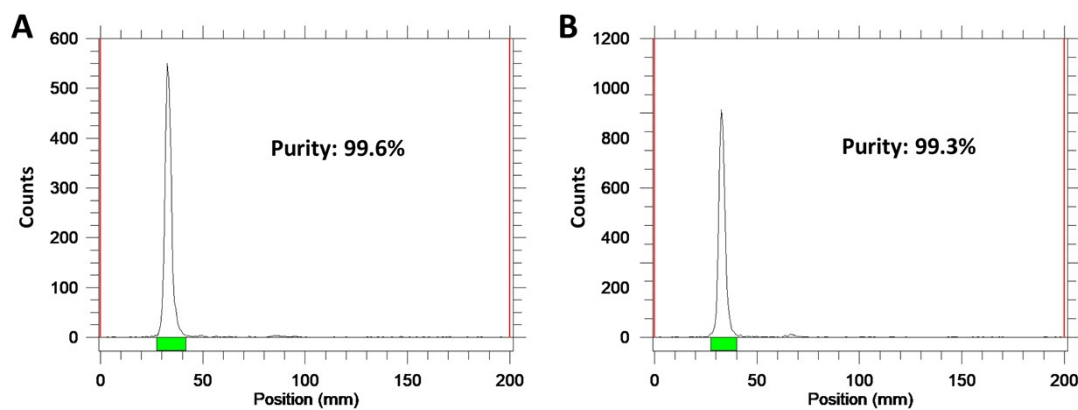

**Fig. S7** The radiochemical purity of ICG@ADY(<sup>125</sup>I) NPs before (A) and after (B) 48 h of incubation with mouse plasma.

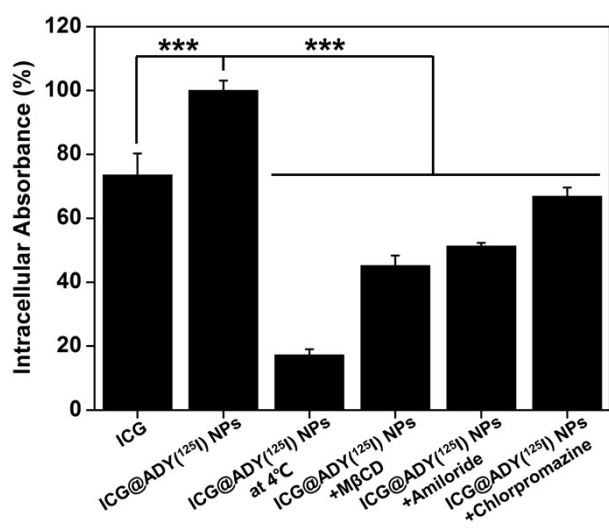

**Fig. S8** Quantitative analysis of ICG in 4T1 cells after the treatment with ICG or ICG@ADY(<sup>125</sup>I) NPs with or without various inhibitors using a UV-visible spectrophotometer. The data are presented as the mean  $\pm$  SD (n = 3). \*\*\* stands for  $P < 0.001$ .

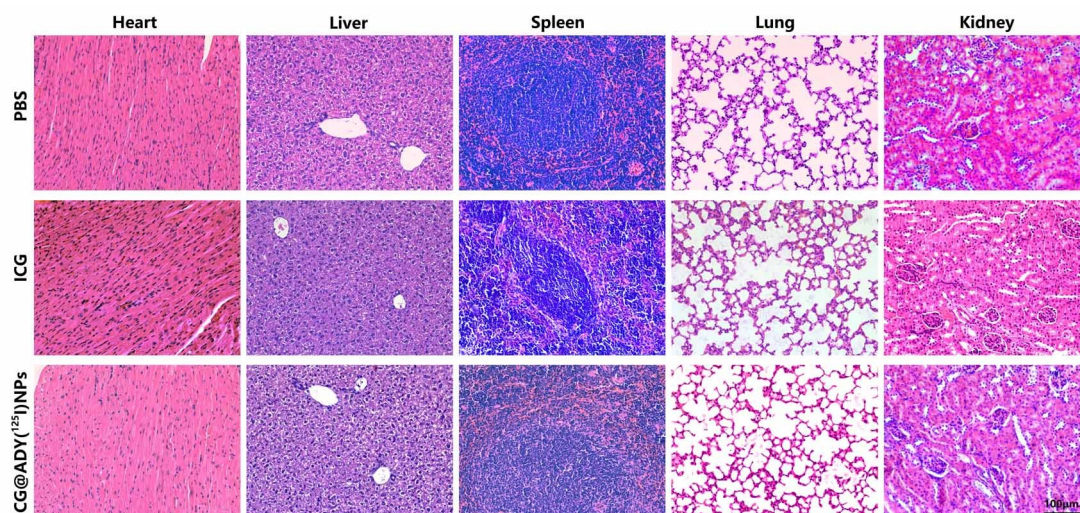

**Fig. S9** H&E stained tissue sections from the heart, liver, spleen, lung, and kidney of the healthy BALB/c mice one week after the two successive days of administration of PBS, ICG, or ICG@ADY(<sup>125</sup>I) NPs.

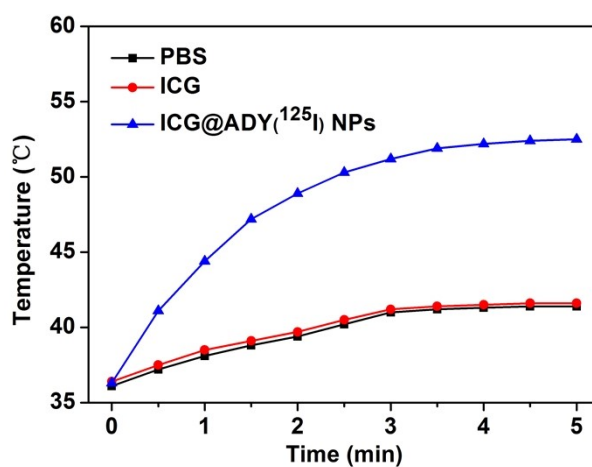

**Fig. S10** The intratumoral temperatures of the 4T1 tumor-bearing mice during an 808 nm laser (1 W/cm<sup>2</sup>) irradiation 24 h after the intravenous administration of PBS, ICG, or ICG@ADY(<sup>125</sup>I) NPs.

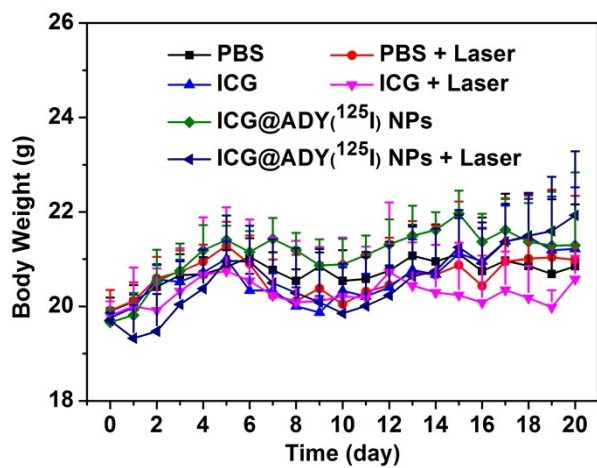

**Fig. S11** Body weight changes in the tumor-bearing mice with various treatments.

The data are presented as the mean  $\pm$  SD (n = 5).

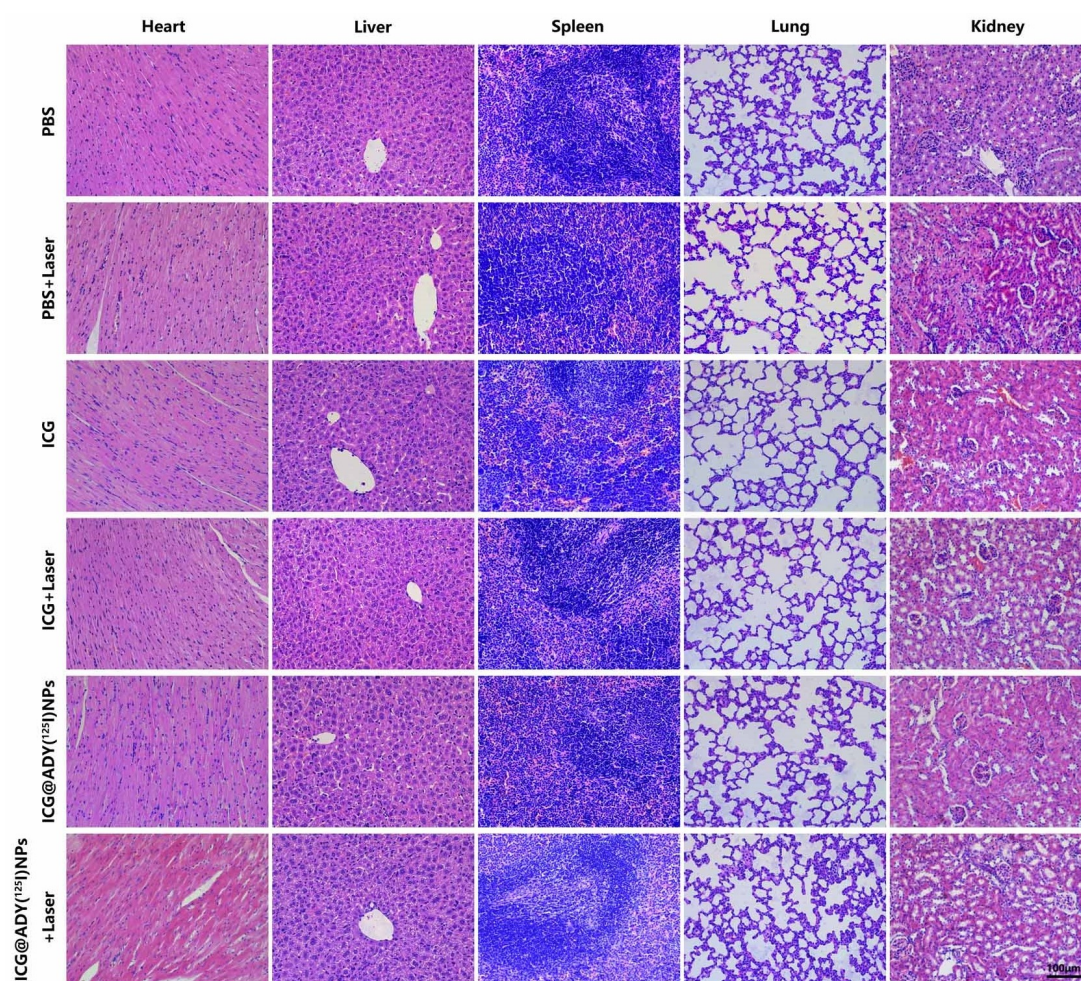

**Fig. S12** H&E-stained tissue sections from the heart, liver, spleen, lung, and kidney of the 4T1 tumor-bearing nude mice on the 20<sup>th</sup> day after PTT/PDT.
